# Supplementary material for: Factors associated with parental burden among parents of children with food allergies in China: a cross-sectional study
Source: HighWire-hosted journal article supplement (doi:10.1136/bmjopen-2022-065772), 2022-09-01
Supplement: bmjopen-2022-065772supp001_data_supplement.pdf [file bmjopen-2022-065772supp001_data_supplement.pdf]

Table S1. STROBE Statement—Checklist of items that should be included in reports of *cross-sectional studies*

|                              | Item No | Recommendation                                                                                                                                                                                    | Page No                |
|------------------------------|---------|---------------------------------------------------------------------------------------------------------------------------------------------------------------------------------------------------|------------------------|
| <b>Title and abstract</b>    | 1       | (a) Indicate the study's design with a commonly used term in the title or the abstract                                                                                                            | 1-2                    |
|                              |         | (b) Provide in the abstract an informative and balanced summary of what was done and what was found                                                                                               | 2                      |
| <b>Introduction</b>          |         |                                                                                                                                                                                                   |                        |
| Background/rationale         | 2       | Explain the scientific background and rationale for the investigation being reported                                                                                                              | 3-6                    |
| Objectives                   | 3       | State specific objectives, including any prespecified hypotheses                                                                                                                                  | 6                      |
| <b>Methods</b>               |         |                                                                                                                                                                                                   |                        |
| Study design                 | 4       | Present key elements of study design early in the paper                                                                                                                                           | 6                      |
| Setting                      | 5       | Describe the setting, locations, and relevant dates, including periods of recruitment, exposure, follow-up, and data collection                                                                   | 6-7                    |
| Participants                 | 6       | (a) Give the eligibility criteria, and the sources and methods of selection of participants                                                                                                       | 6-7                    |
| Variables                    | 7       | Clearly define all outcomes, exposures, predictors, potential confounders, and effect modifiers. Give diagnostic criteria, if applicable                                                          | 8-10                   |
| Data sources/<br>measurement | 8*      | For each variable of interest, give sources of data and details of methods of assessment (measurement). Describe comparability of assessment methods if there is more than one group              | 8-10                   |
| Bias                         | 9       | Describe any efforts to address potential sources of bias                                                                                                                                         | 11                     |
| Study size                   | 10      | Explain how the study size was arrived at                                                                                                                                                         | 6-7                    |
| Quantitative variables       | 11      | Explain how quantitative variables were handled in the analyses. If applicable, describe which groupings were chosen and why                                                                      | 8-10<br>Tables<br>1-4  |
| Statistical methods          | 12      | (a) Describe all statistical methods, including those used to control for confounding                                                                                                             | 11                     |
|                              |         | (b) Describe any methods used to examine subgroups and interactions                                                                                                                               | N/A                    |
|                              |         | (c) Explain how missing data were addressed                                                                                                                                                       | N/A                    |
|                              |         | (d) If applicable, describe analytical methods taking account of sampling strategy                                                                                                                | N/A                    |
|                              |         | (e) Describe any sensitivity analyses                                                                                                                                                             | N/A                    |
| <b>Results</b>               |         |                                                                                                                                                                                                   |                        |
| Participants                 | 13*     | (a) Report numbers of individuals at each stage of study—eg numbers potentially eligible, examined for eligibility, confirmed eligible, included in the study, completing follow-up, and analysed | 12-14                  |
|                              |         | (b) Give reasons for non-participation at each stage                                                                                                                                              | N/A                    |
|                              |         | (c) Consider use of a flow diagram                                                                                                                                                                | N/A                    |
| Descriptive data             | 14*     | (a) Give characteristics of study participants (eg demographic, clinical, social) and information on exposures and potential confounders                                                          | 12-14<br>Tables<br>1-2 |
|                              |         | (b) Indicate number of participants with missing data for each variable of interest                                                                                                               | N/A                    |

|                          |     |                                                                                                                                                                                                              |            |
|--------------------------|-----|--------------------------------------------------------------------------------------------------------------------------------------------------------------------------------------------------------------|------------|
| Outcome data             | 15* | Report numbers of outcome events or summary measures                                                                                                                                                         | Tables 3-4 |
| Main results             | 16  | (a) Give unadjusted estimates and, if applicable, confounder-adjusted estimates and their precision (eg, 95% confidence interval). Make clear which confounders were adjusted for and why they were included | N/A        |
|                          |     | (b) Report category boundaries when continuous variables were categorized                                                                                                                                    | N/A        |
|                          |     | (c) If relevant, consider translating estimates of relative risk into absolute risk for a meaningful time period                                                                                             | N/A        |
| Other analyses           | 17  | Report other analyses done—eg analyses of subgroups and interactions, and sensitivity analyses                                                                                                               | N/A        |
| <b>Discussion</b>        |     |                                                                                                                                                                                                              |            |
| Key results              | 18  | Summarise key results with reference to study objectives                                                                                                                                                     | 17-20      |
| Limitations              | 19  | Discuss limitations of the study, taking into account sources of potential bias or imprecision. Discuss both direction and magnitude of any potential bias                                                   | 21-22      |
| Interpretation           | 20  | Give a cautious overall interpretation of results considering objectives, limitations, multiplicity of analyses, results from similar studies, and other relevant evidence                                   | 21         |
| Generalisability         | 21  | Discuss the generalisability (external validity) of the study results                                                                                                                                        | 21         |
| <b>Other information</b> |     |                                                                                                                                                                                                              |            |
| Funding                  | 22  | Give the source of funding and the role of the funders for the present study and, if applicable, for the original study on which the present article is based                                                | 23         |

\*Give information separately for exposed and unexposed groups.
